# Supplementary material for: Tumor Heterogeneity Predicts Metastatic Potential in Colorectal Cancer
Source: Oxford University Press journal article supplement (doi:10.1158/1078-0432.ccr-17-0306), 2017-09-22
Supplement: 10780432ccr170306-sup-178413_3_supp_4237361_vvdvv5.xlsx [file 10780432ccr170306-sup-178413_3_supp_4237361_vvdvv5.xlsx]

## Sheet: Sheet1
Supplementary Table S2. Transition types of clonality and mutation prifiles in CRC patients
mCRC (primary colon tumor)							mCRC (metastatic liver tumor)
ID	APC	KRAS	TP53	Clones	(0=oligo, 1=multi)		ID	APC	KRAS	TP53	Clones	(0=oligo, 1=multi)		Transition Type
mCRC-01-P	1	0	1	2	0		mCRC-01-M	1	0	1	2	0		CRC-OO
mCRC-02-P	1	0	0	2	0		mCRC-02-M	0	0	1	2	0		CRC-OO
mCRC-03-P	1	0	1	2	0		mCRC-03-M	1	0	1	1	0		CRC-OO
mCRC-04-P	0	1	0	4	1		mCRC-04-M	1	0	1	3	1		CRC-MM
mCRC-05-P	1	1	1	3	1		mCRC-05-M	0	0	1	3	1		CRC-MM
mCRC-06-P	1	0	1	5	1		mCRC-06-M	0	0	1	2	0		CRC-MO
mCRC-07-P	1	0	0	4	1		mCRC-07-M	1	0	0	4	1		CRC-MM
mCRC-08-P	0	1	0	2	0		mCRC-08-M	0	1	0	4	1		CRC-OM
mCRC-09-P	1	0	1	3	1		mCRC-09-M	1	0	1	4	1		CRC-MM
mCRC-10-P	1	0	1	3	1		mCRC-10-M	1	0	1	3	1		CRC-MM
mCRC-11-P	1	1	0	4	1		mCRC-11-M	1	1	0	4	1		CRC-MM
mCRC-12-P	1	0	0	3	1		mCRC-12-M	0	0	0	2	0		CRC-MO
mCRC-13-P	1	0	1	1	0		mCRC-13-M	0	0	0	1	0		CRC-OO
mCRC-14-P	0	0	0	2	0		mCRC-14-M	0	0	0	1	0		CRC-OO
mCRC-15-P	1	0	1	3	1		mCRC-15-M	1	0	1	2	0		CRC-MO
mCRC-16-P	0	0	1	5	1		mCRC-16-M	0	0	1	5	1		CRC-MM
mCRC-17-P	0	0	1	3	1		mCRC-17-M	0	0	1	3	1		CRC-MM
mCRC-18-P	0	1	0	3	1		mCRC-18-M	0	1	0	2	0		CRC-MO
mCRC-19-P	0	1	1	3	1		mCRC-19-M	0	1	1	3	1		CRC-MM
mCRC-20-P	1	1	1	3	1		mCRC-20-M	1	1	1	3	1		CRC-MM
mCRC-21-P	1	1	0	4	1		mCRC-21-M	1	1	0	3	1		CRC-MM
mCRC-22-P	0	0	1	5	1		mCRC-22-M	0	0	1	3	1		CRC-MM
mCRC-23-P	0	0	1	5	1		mCRC-23-M	0	0	1	4	1		CRC-MM
mCRC-24-P	1	0	0	4	1		mCRC-24-M	1	0	0	3	1		CRC-MM
mCRC-25-P	1	1	0	3	1		mCRC-25-M	1	1	0	3	1		CRC-MM
mCRC-26-P	0	1	1	3	1		mCRC-26-M	0	1	1	3	1		CRC-MM
mCRC-27-P	1	0	1	1	0		mCRC-27-M	1	0	1	2	0		CRC-OO
mCRC-28-P	0	1	0	2	0		mCRC-28-M	0	1	0	3	1		CRC-OM
mCRC-29-P	1	0	0	3	1		mCRC-29-M	1	0	0	3	1		CRC-MM
mCRC-30-P	1	0	1	3	1		mCRC-30-M	1	0	1	5	1		CRC-MM
mCRC-31-P	1	1	1	4	1		mCRC-31-M	1	1	1	3	1		CRC-MM
mCRC-32-P	0	0	0	4	1		mCRC-32-M	0	0	0	3	1		CRC-MM
mCRC-33-P	0	0	0	4	1		mCRC-33-M	0	0	0	4	1		CRC-MM
mCRC-34-P	0	0	1	4	1		mCRC-34-M	0	0	1	3	1		CRC-MM
mCRC-35-P	1	1	1	4	1		mCRC-35-M	1	1	1	5	1		CRC-MM
mCRC-36-P	1	0	1	3	1		mCRC-36-M	1	0	1	4	1		CRC-MM
mCRC-37-P	1	0	0	4	1		mCRC-37-M	1	0	0	3	1		CRC-MM
mCRC-38-P	0	1	0	3	1		mCRC-38-M	0	1	0	3	1		CRC-MM
mCRC-39-P	1	0	0	3	1		mCRC-39-M	1	0	0	4	1		CRC-MM
mCRC-40-P	0	1	1	3	1		mCRC-40-M	0	1	1	3	1		CRC-MM
mCRC-41-P	0	0	1	3	1		mCRC-41-M	0	0	1	3	1		CRC-MM
mCRC-42-P	1	1	0	3	1		mCRC-42-M	1	1	0	3	1		CRC-MM
mCRC-43-P	0	1	1	3	1		mCRC-43-M	0	1	1	3	1		CRC-MM
mCRC-44-P	1	0	0	3	1		mCRC-44-M	1	0	0	3	1		CRC-MM
mCRC-45-P	1	0	0	4	1		mCRC-45-M	1	0	0	4	1		CRC-MM
mCRC-46-P	0	0	0	1	0		mCRC-46-M	0	0	0	1	0		CRC-OO
nmCRC (primary colon tumor)
ID	APC	KRAS	TP53	Clones	(0=oligo, 1=multi)
nmCRC-01-P	1	0	1	3	1
nmCRC-02-P	0	0	1	1	0
nmCRC-03-P	1	1	0	4	1
nmCRC-04-P	0	0	0	1	0
nmCRC-05-P	1	0	1	3	1
nmCRC-06-P	0	0	1	2	0
nmCRC-07-P	0	0	0	1	0
nmCRC-08-P	0	0	0	2	0
nmCRC-09-P	1	1	0	4	1
nmCRC-10-P	0	1	0	3	1
nmCRC-11-P	0	1	1	4	1
nmCRC-12-P	1	1	1	2	0
nmCRC-13-P	0	0	1	3	1
nmCRC-14-P	1	0	0	2	0
nmCRC-15-P	0	0	1	3	1
nmCRC-16-P	0	0	1	4	1
nmCRC-17-P	0	0	0	1	0
nmCRC-18-P	0	0	0	2	0
nmCRC-19-P	1	0	0	4	1
nmCRC-20-P	0	1	1	3	1
nmCRC-21-P	0	1	0	3	1
nmCRC-22-P	0	1	1	3	1
nmCRC-23-P	1	0	1	3	1
nmCRC-24-P	0	1	1	4	1
nmCRC-25-P	1	0	1	4	1
nmCRC-26-P	1	1	0	4	1
nmCRC-27-P	0	1	1	4	1
nmCRC-28-P	0	1	1	2	0
nmCRC-29-P	0	1	0	1	0
nmCRC-30-P	0	0	0	2	0
nmCRC-31-P	1	1	0	3	1
nmCRC-32-P	1	1	0	3	1
nmCRC-33-P	1	1	0	3	1
nmCRC-34-P	0	1	0	2	0
nmCRC-35-P	1	0	1	3	1
nmCRC-36-P	1	0	1	2	0
nmCRC-37-P	1	0	1	3	1
nmCRC-38-P	0	0	0	1	0
nmCRC-39-P	1	1	1	2	0
nmCRC-40-P	1	0	1	3	1
nmCRC-41-P	1	0	1	1	0
nmCRC-42-P	1	0	1	2	0
