# Supplementary material for: Tumor Heterogeneity Predicts Metastatic Potential in Colorectal Cancer
Source: Oxford University Press journal article supplement (doi:10.1158/1078-0432.ccr-17-0306), 2017-09-22
Supplement: 10780432ccr170306-sup-178413_3_supp_4237362_7vd775.xlsx [file 10780432ccr170306-sup-178413_3_supp_4237362_7vd775.xlsx]

## Sheet: Sheet1
Supplementary Table S1. Read mapping information of CRC samples
	Total Reads	Mean Target Coverage	Targeted Region (%)	Sample Type
mCRC-01-P	95288053	111.281	99.1446	Primary
mCRC-02-P	138063873	145.075	99.0812	Primary
mCRC-03-P	162031647	187.773	99.1298	Primary
mCRC-04-P	199951784	239.405	99.0487	Primary
mCRC-05-P	140291583	146.468	99.1181	Primary
mCRC-06-P	224574156	258.96	99.2435	Primary
mCRC-07-P	142264530	160.157	99.1802	Primary
mCRC-08-P	162901824	197.048	99.0556	Primary
mCRC-09-P	267985045	302.145	99.2687	Primary
mCRC-10-P	183000946	221.064	99.0461	Primary
mCRC-11-P	155665249	185.948	99.0331	Primary
mCRC-12-P	204201389	245.657	99.2279	Primary
mCRC-13-P	106147263	138.913	99.1685	Primary
mCRC-14-P	158800811	202.485	99.0682	Primary
mCRC-15-P	95198022	103.41	99.9	Primary
mCRC-16-P	171174730	179.46	99.8	Primary
mCRC-17-P	154719812	115.77	99.8	Primary
mCRC-18-P	184506122	184.76	99.7	Primary
mCRC-19-P	195907918	210.26	99.8	Primary
mCRC-20-P	161908243	160.75	99.7	Primary
mCRC-21-P	155317572	161.57	99.8	Primary
mCRC-22-P	145913137	156.16	99.7	Primary
mCRC-23-P	160709393	171.41	99.7	Primary
mCRC-24-P	166635984	133.43	99.7	Primary
mCRC-25-P	165220703	190.98	99.7	Primary
mCRC-26-P	154749641	134.02	99.7	Primary
mCRC-27-P	104988284	97.72	99.8	Primary
mCRC-28-P	179339882	189.22	99.8	Primary
mCRC-29-P	231604978	238.73	99.8	Primary
mCRC-30-P	176292282	192.78	99.9	Primary
mCRC-31-P	204732589	225.35	99.8	Primary
mCRC-32-P	151074709	153.69	99.7	Primary
mCRC-33-P	101053961	94.06	99.7	Primary
mCRC-34-P	101121063	105.48	99.7	Primary
mCRC-35-P	163558642	124.03	99.7	Primary
mCRC-36-P	176690082	138.21	99.8	Primary
mCRC-37-P	173048524	164.24	99.8	Primary
mCRC-38-P	93164311	79.16	99.6	Primary
mCRC-39-P	156946979	183.35	99.8	Primary
mCRC-40-P	126870001	138.41	99.9	Primary
mCRC-41-P	92939542	92.02	99.7	Primary
mCRC-42-P	181168823	185.32	99.8	Primary
mCRC-43-P	207393531	215.06	99.8	Primary
mCRC-44-P	89923327	91.91	99.7	Primary
mCRC-45-P	143828825	171.55	99.8	Primary
mCRC-46-P	180122576	188.64	99.8	Primary
nmCRC-01-P	135905287	147.214	99.2357	Primary
nmCRC-02-P	139814342	168.987	99.1967	Primary
nmCRC-03-P	146551736	150.247	98.8651	Primary
nmCRC-04-P	108052102	62.418	98.504	Primary
nmCRC-05-P	150750225	164.888	99.0057	Primary
nmCRC-06-P	143596707	180.381	99.1685	Primary
nmCRC-07-P	144058954	179.412	99.1745	Primary
nmCRC-08-P	191348689	233.462	99.0122	Primary
nmCRC-09-P	204878071	250.477	99.129	Primary
nmCRC-10-P	227769078	256.236	99.1732	Primary
nmCRC-11-P	184752976	229.707	99.0105	Primary
nmCRC-12-P	268019238	324.714	99.1038	Primary
nmCRC-13-P	230524280	272.614	99.0066	Primary
nmCRC-14-P	187434007	226.636	99.1238	Primary
nmCRC-15-P	209597419	239.107	99.0608	Primary
nmCRC-16-P	171663538	203.588	99.1064	Primary
nmCRC-17-P	180516271	218.047	99.0296	Primary
nmCRC-18-P	164885802	188.193	98.9484	Primary
nmCRC-19-P	182580904	219.555	98.9949	Primary
nmCRC-20-P	208146313	241.205	99.0053	Primary
nmCRC-21-P	218540742	251.739	99.1346	Primary
nmCRC-22-P	227997036	281.183	99.1468	Primary
nmCRC-23-P	185607385	224.355	99.1025	Primary
nmCRC-24-P	166768185	207.866	98.9441	Primary
nmCRC-25-P	111079840	135.987	98.9858	Primary
nmCRC-26-P	143387108	174.837	99.112	Primary
nmCRC-27-P	140092473	170.038	99.1029	Primary
nmCRC-28-P	140039829	107.525	98.9497	Primary
nmCRC-29-P	173588434	187.52	99.7	Primary
nmCRC-30-P	133373934	122.77	99.7	Primary
nmCRC-31-P	163418587	140.17	99.7	Primary
nmCRC-32-P	141208255	161.11	99.7	Primary
nmCRC-33-P	154642152	166.62	99.7	Primary
nmCRC-34-P	148436677	178.24	99.8	Primary
nmCRC-35-P	191723331	203.99	99.8	Primary
nmCRC-36-P	129213740	150.86	99.8	Primary
nmCRC-37-P	88995791	97.29	99.8	Primary
nmCRC-38-P	175923483	134.2	99.8	Primary
nmCRC-39-P	132661849	157.64	99.7	Primary
nmCRC-40-P	152900371	179.72	99.8	Primary
nmCRC-41-P	141392574	168.77	99.7	Primary
nmCRC-42-P	141281594	130.14	99.9	Primary
mCRC-01-M	140956160	176.338	99.1819	Metastatic Liver
mCRC-02-M	142050994	130.903	99.0075	Metastatic Liver
mCRC-03-M	144610685	155.905	99.0873	Metastatic Liver
mCRC-04-M	186001999	230.586	99.0339	Metastatic Liver
mCRC-05-M	99528488	77.7666	98.83	Metastatic Liver
mCRC-06-M	205003458	231.653	99.1455	Metastatic Liver
mCRC-07-M	96515036	92.3893	98.935	Metastatic Liver
mCRC-08-M	130722703	162	99.0574	Metastatic Liver
mCRC-09-M	181573096	222.723	99.1047	Metastatic Liver
mCRC-10-M	207245039	242.019	99.0986	Metastatic Liver
mCRC-11-M	154691936	188.952	99.0834	Metastatic Liver
mCRC-12-M	209449532	254.527	99.168	Metastatic Liver
mCRC-13-M	184458731	224.003	99.0686	Metastatic Liver
mCRC-14-M	149688239	180.836	99.0548	Metastatic Liver
mCRC-15-M	168875298	178.38	99.8	Metastatic Liver
mCRC-16-M	195180295	223.84	99.9	Metastatic Liver
mCRC-17-M	190663690	194.41	99.8	Metastatic Liver
mCRC-18-M	154596217	157.97	99.7	Metastatic Liver
mCRC-19-M	189728217	200.93	99.8	Metastatic Liver
mCRC-20-M	173278175	171.65	99.7	Metastatic Liver
mCRC-21-M	175820523	155.19	99.8	Metastatic Liver
mCRC-22-M	168847074	175.39	99.7	Metastatic Liver
mCRC-23-M	139181203	154.96	99.7	Metastatic Liver
mCRC-24-M	146918821	149.73	99.7	Metastatic Liver
mCRC-25-M	132505663	139.47	99.7	Metastatic Liver
mCRC-26-M	163781493	154.26	99.7	Metastatic Liver
mCRC-27-M	91256465	95.45	99.9	Metastatic Liver
mCRC-28-M	177339582	190.07	99.8	Metastatic Liver
mCRC-29-M	246117709	243.3	99.8	Metastatic Liver
mCRC-30-M	149689879	150.14	99.8	Metastatic Liver
mCRC-31-M	188339466	198.93	99.8	Metastatic Liver
mCRC-32-M	132560578	145.42	99.7	Metastatic Liver
mCRC-33-M	97750359	94.07	99.7	Metastatic Liver
mCRC-34-M	118201167	127.43	99.7	Metastatic Liver
mCRC-35-M	148221043	152.38	99.6	Metastatic Liver
mCRC-36-M	179199015	194.44	99.9	Metastatic Liver
mCRC-37-M	154301750	120.19	99.8	Metastatic Liver
mCRC-38-M	156723389	123.69	99.8	Metastatic Liver
mCRC-39-M	139665572	164.53	99.8	Metastatic Liver
mCRC-40-M	163764762	189.89	99.7	Metastatic Liver
mCRC-41-M	88547045	88.78	99.6	Metastatic Liver
mCRC-42-M	103794141	100.45	99.8	Metastatic Liver
mCRC-43-M	113501730	121.23	99.7	Metastatic Liver
mCRC-44-M	232536085	175.32	99.9	Metastatic Liver
mCRC-45-M	158519451	184.68	99.8	Metastatic Liver
mCRC-46-M	203925187	222.06	99.8	Metastatic Liver
mCRC-01-B	285933430	343.331	99.211	Normal
mCRC-02-B	139767399	169.687	99.1507	Normal
mCRC-03-B	285081851	336.825	99.1988	Normal
mCRC-04-B	168381534	196.268	99.0578	Normal
mCRC-05-B	117539418	140.302	99.1294	Normal
mCRC-06-B	143391327	171.864	99.1481	Normal
mCRC-07-B	122640835	144.974	99.1537	Normal
mCRC-08-B	143976086	173.747	99.0283	Normal
mCRC-09-B	138659763	161.388	99.165	Normal
mCRC-10-B	153387803	185.403	99.037	Normal
mCRC-11-B	114155141	140.704	99.0248	Normal
mCRC-12-B	164822864	194.336	99.1628	Normal
mCRC-13-B	182529460	222.762	99.1481	Normal
mCRC-14-B	152648913	169.818	99.0257	Normal
mCRC-15-B	105171538	111.62	99.7	Normal
mCRC-16-B	125862879	117.24	99.8	Blood
mCRC-17-B	113592229	119.9	99.8	Blood
mCRC-18-B	127474586	129.75	99.7	Blood
mCRC-19-B	119044996	122.87	99.7	Blood
mCRC-20-B	109059579	109.32	99.6	Blood
mCRC-21-B	111014530	112.71	99.8	Blood
mCRC-22-B	92920360	94.98	99.6	Blood
mCRC-23-B	117577025	117.47	99.7	Blood
mCRC-24-B	116006094	121.56	99.7	Normal
mCRC-25-B	118652935	121.43	99.7	Blood
mCRC-26-B	125436893	98.5	99.7	Normal
mCRC-27-B	101952914	101.03	99.8	Normal
mCRC-28-B	127137483	125.87	99.8	Blood
mCRC-29-B	202358963	219.96	99.8	Blood
mCRC-30-B	169465993	183.29	99.8	Blood
mCRC-31-B	216808508	225.12	99.8	Blood
mCRC-32-B	139429252	148.26	99.7	Normal
mCRC-33-B	102648351	109.74	99.8	Blood
mCRC-34-B	150608057	125.44	99.8	Blood
mCRC-35-B	114349179	120.51	99.7	Normal
mCRC-36-B	110627580	116.08	99.8	Blood
mCRC-37-B	109612303	117.97	99.8	Normal
mCRC-38-B	89956587	95.99	99.5	Blood
mCRC-39-B	130175268	151.66	99.7	Blood
mCRC-40-B	119978399	141.56	99.8	Blood
mCRC-41-B	101935188	103.05	99.7	Blood
mCRC-42-B	90363288	98.27	99.7	Blood
mCRC-43-B	77004221	80.38	99.6	Blood
mCRC-44-B	117043155	104.89	99.7	Blood
mCRC-45-B	110046332	129.8	99.8	Blood
mCRC-46-B	277226807	200.82	99.8	Blood
nmCRC-01-B	126244915	152.787	99.1537	Normal
nmCRC-02-B	172796309	197.764	99.1789	Normal
nmCRC-03-B	132369762	152.475	99.0144	Normal
nmCRC-04-B	122171491	134.642	99.0947	Normal
nmCRC-05-B	151438864	179.643	99.0643	Normal
nmCRC-06-B	156241562	180.83	99.1511	Normal
nmCRC-07-B	175009808	206.616	99.1424	Normal
nmCRC-08-B	145158144	166.751	98.9918	Normal
nmCRC-09-B	161361502	192.041	99.1186	Normal
nmCRC-10-B	150641518	168.653	99.1633	Normal
nmCRC-11-B	167871566	199.508	99.0309	Normal
nmCRC-12-B	150881309	184.031	98.9953	Normal
nmCRC-13-B	148211361	175.074	98.8673	Normal
nmCRC-14-B	173548408	209.52	99.1203	Normal
nmCRC-15-B	173803726	205.733	99.0726	Normal
nmCRC-16-B	194887996	230.212	99.1398	Normal
nmCRC-17-B	153234735	174.768	99.0135	Normal
nmCRC-18-B	154934798	187	98.951	Normal
nmCRC-19-B	176687159	212.028	98.9975	Normal
nmCRC-20-B	167790943	195.566	99.0426	Normal
nmCRC-21-B	152532926	177.72	99.129	Normal
nmCRC-22-B	166061607	200.815	99.0713	Normal
nmCRC-23-B	159024758	193.217	99.1086	Normal
nmCRC-24-B	133769031	142.696	98.9836	Normal
nmCRC-25-B	180064980	224.927	99.0192	Normal
nmCRC-26-B	80227953	73.2542	99.037	Normal
nmCRC-27-B	143576029	164.699	99.122	Normal
nmCRC-28-B	121676252	141.059	98.9758	Normal
nmCRC-29-B	78789512	80.28	99.6	Blood
nmCRC-30-B	96967698	100.16	99.7	Blood
nmCRC-31-B	131356510	126.51	99.7	Blood
nmCRC-32-B	118648203	126.25	99.7	Normal
nmCRC-33-B	128826700	138.66	99.7	Blood
nmCRC-34-B	98036521	83.4	99.8	Normal
nmCRC-35-B	88285381	90.6	99.7	Blood
nmCRC-36-B	103985349	120.26	99.8	Normal
nmCRC-37-B	139571755	144.82	99.8	Blood
nmCRC-38-B	118255460	119.77	99.7	Normal
nmCRC-39-B	122010796	121.39	99.6	Normal
nmCRC-40-B	119042061	137.49	99.7	Blood
nmCRC-41-B	93198737	95.94	99.6	Normal
nmCRC-42-B	100971702	112.11	99.7	Normal
